# Supplementary material
Source: PubMed Central journal article supplement (PMC3126388)
Supplement: supp_77_9_2975__1.pdf [file supp_77_9_2975__1.pdf]

**SUPPLEMENTAL TABLE S1**

**Primers used in this study**

| ORF code   | Gene        | Primer               | Sequence (5' to 3' oriented)              | Target      |
|------------|-------------|----------------------|-------------------------------------------|-------------|
| An08g08280 | <i>cfrA</i> | cfrAP1KpnI           | GGGGTACCGCCGTTGTTCCATAACCCG               | Δ, 5' flank |
|            |             | cfrAP2XhoI           | CCGCTCGAGTGTGCGTGGGTAGATGGGATGA           | Δ, 5' flank |
|            |             | cfrAP3HindIII        | CCC <u>AAGCTT</u> TTTTTTGTCCATATGAATACCA  | Δ, 3' flank |
|            |             | cfrAP4NotI           | AAGGAAAAAAGCGGCCGCGAGGAATGTGTTACAGCTGTGGG | Δ, 3' flank |
|            |             | cfrAP5PmeI           | <u>GTTTAAAC</u> ACCATGTTGTTTCGCCTTCTATCC  | OE, ORF     |
|            |             | cfrAP6PmeI           | <u>GTTTAAACTC</u> ACGTGGGTATGTATGCTAT     | OE, ORF     |
| An07g07170 | <i>cfrB</i> | cfrBP1KpnI           | GGGGTACCGCGGGTGGAGAGTATGATCCT             | Δ, 5' flank |
|            |             | cfrBP2XhoI           | CCGCTCGAGTGTGTCCTGATTGTGCTTGCC            | Δ, 5' flank |
|            |             | cfrBP3HindIII        | CCC <u>AAGCTT</u> TGTACCTTGATGCGTGGCCGGG  | Δ, 3' flank |
|            |             | cfrBP4NotI           | AAGGAAAAAAGCGGCCGCGAGACAGGAGTTTGACAGCCG   | Δ, 3' flank |
|            |             | cfrBP5PmeI           | <u>GTTTAAAC</u> ACCATGGGTCTGGCATACAACAT   | OE, ORF     |
|            |             | cfrBP6PmeI           | <u>GTTTAAACT</u> AGCACACCACGCACAGCAG      | OE, ORF     |
| An16g05020 | <i>cfrC</i> | cfrCP1KpnI           | GGGGTACAGTGTAGGTTGTTCCGGGCG               | Δ, 5' flank |
|            |             | cfrCP2XhoI           | CCGCTCGAGGATGAATGAAGTGAGTCTTGGA           | Δ, 5' flank |
|            |             | cfrCP3HindIII        | CCC <u>AAGCTT</u> GCATAATTGAATTGAAAGAAAAT | Δ, 3' flank |
|            |             | cfrCP4NotI           | AAGGAAAAAAGCGGCCGCGACAAGAACCTCCCTCGCAGG   | Δ, 3' flank |
|            |             | cfrCP5PmeI           | <u>GTTTAAAC</u> ACCATGTCTGAACGCTCCACCGT   | OE, ORF     |
|            |             | cfrCP6PmeI           | <u>GTTTAAACT</u> TACGCTGCTCAGCAGGAG       | OE, ORF     |
| An11g05330 | <i>cfrE</i> | cfrEP1KpnI           | GGGGTACCTGTTTCCATAGCGGAGGCG               | Δ, 5' flank |
|            |             | cfrEP2XhoI           | CCGCTCGAGTGTGCGAGTTGCTTCTCTCAC            | Δ, 5' flank |
|            |             | cfrEP3HindIII        | CCC <u>AAGCTT</u> GGGGTAGATACCATTTTGCCA   | Δ, 3' flank |
|            |             | cfrEP4NotI           | AAGGAAAAAAGCGGCCGCGCCTCTACAAGGACATGC      | Δ, 3' flank |
|            |             | cfrEP5PmeI           | <u>GTTTAAAC</u> ACCATGTCCCCTTGTATCAGCG    | OE, ORF     |
|            |             | cfrEP6PmeI           | <u>GTTTAAACT</u> TAAAGAGGATGCAGACTCCG     | OE, ORF     |
| An18g03740 | <i>cfrF</i> | cfrFP1KpnI           | GGGGTACCGACACCTGAGTTCGATCCCAG             | Δ, 5' flank |
|            |             | cfrFP2XhoI           | CCGCTCGAGTGTGCGAGATTGTTTGCCTCTCA          | Δ, 5' flank |
|            |             | cfrFP3HindIII        | CCC <u>AAGCTT</u> CCCGGATGTCAAAAGCATAACG  | Δ, 3' flank |
|            |             | cfrFP4NotI           | AAGGAAAAAAGCGGCCGCGCTATTCCGGTGCCAATCACT   | Δ, 3' flank |
|            |             | cfrFP5PmeI           | <u>GTTTAAAC</u> ACCATGTCTATCCTCGCCGGTTC   | OE, ORF     |
|            |             | cfrFP6PmeI           | <u>GTTTAAACT</u> CAACCAAGGGCCAGCCACT      | OE, ORF     |
|            |             | cfrFP7for            | TCATTGGTGGTTTGCATCGT                      | Seq ORF     |
| An17g02350 | <i>cfrG</i> | cfrGP1NotI           | AAGGAAAAAAGCGGCCGCTCGTGGCGAAGGCCTTAAC     | Δ, 5' flank |
|            |             | cfrGP2HindIII        | CCC <u>AAGCTT</u> CTTTTAGAATACGGAGCGGGA   | Δ, 5' flank |
|            |             | cfrGP3XhoI           | CCGCTCGAGTAAGGCTTATGATGTAGCAGG            | Δ, 3' flank |
|            |             | cfrGP4KpnI           | GGGGTACCGCAAATAACATACCACGCCGC             | Δ, 3' flank |
|            |             | cfrGP5PmeI           | <u>GTTTAAAC</u> ACCATGCCTAGTGCACCGAAGCA   | OE, ORF     |
|            |             | cfrGP6PmeI           | <u>GTTTAAACTC</u> ACATTACAGCGCATTGT       | OE, ORF     |
|            | <i>mluc</i> | mlucP1 for qPCR      | GCTGGTGCCAACCCTATTCT                      | qPCR        |
|            |             | mlucP2rev qPCR       | CCTGGCAGATGGAACCTCTT                      | qPCR        |
| An16g01800 | <i>gpdA</i> | gpdA fw              | AGGGACCATCGAGACCTAC                       | qPCR        |
|            |             | gpdA rev             | TGGGTGGTGAAGACACCAGT                      | qPCR        |
| An11g11310 | <i>H2B</i>  | H2B fw               | CTCGAAACTTGCCGCTTACA                      | qPCR        |
|            |             | H2B rev              | ACTTCGTGACAGCCTTGGTG                      | qPCR        |
| An15g00560 | <i>actA</i> | actAP6for-Kpn        | GGGGTACCAG ACCAGACCAA ACCCAACG            | Δ, 5' flank |
|            |             | actAP8rev-XhoI       | CCGCTCGAGC AAGTTATCA TCGCGACCA            | Δ, 5' flank |
|            |             | actAP3for-HindIII    | CCC <u>AAGCTT</u> TGGTATGTGCTTATCATCCAGA  | Δ, 3' flank |
|            |             | actAP4rev-Not        | AAGGAAAAAAGCGGCCGCTGGTTCGATGGTCCCTCTCAGG  | Δ, 3' flank |
|            |             | BN105_actin_fw_PmeI  | AGCTTTGTTTAAACATGGAAGGTAAGGGCTTCCTGC      | OE, ORF     |
|            |             | BN106_actin_rev_PmeI | AGCTTTGTTTAAACTTAGAAGCACTTGCGGTGGACG      | OE, ORF     |
